# Supplementary material
Source: PubMed Central journal article supplement (PMC8800485)
Supplement: NIHMS1607575-supplement-2.pdf [file NIHMS1607575-supplement-2.pdf]

**Cell, Volume 181**

## **Supplemental Information**

### **Molecular Transducers of Physical Activity**

#### **Consortium (MoTrPAC): Mapping the Dynamic**

#### **Responses to Exercise**

**James A. Sanford, Christopher D. Nogiec, Malene E. Lindholm, Joshua N. Adkins, David Amar, Surendra Dasari, Jonelle K. Drugan, Facundo M. Fernández, Shlomit Radom-Aizik, Simon Schenk, Michael P. Snyder, Russell P. Tracy, Patrick Vanderboom, Scott Trappe, Martin J. Walsh, and the Molecular Transducers of Physical Activity Consortium**

## Supplemental Information

### MoTrPAC Consortium and Affiliated Members

#### Bioinformatics Center:

David Amar,<sup>1</sup> Euan A. Ashley,<sup>1</sup> Elizabeth T. Chin,<sup>1</sup> Jeffrey W. Christle,<sup>1</sup> Karen P. Dalton,<sup>1</sup> Trevor Hastie,<sup>1</sup> Steven G. Hershman,<sup>1</sup> David Jimenez-Morales,<sup>1</sup> Young Suk Kim,<sup>1</sup> Malene E. Lindholm,<sup>1</sup> Shruti Marwaha,<sup>1</sup> Archana Raja,<sup>1</sup> Manuel A. Rivas,<sup>1</sup> Robert Tibshirani,<sup>1</sup> Matthew T. Wheeler,<sup>1</sup> Jimmy Zhen<sup>1</sup>

<sup>1</sup>Division of Cardiovascular Medicine, School of Medicine, Stanford University, Stanford, CA 94305, USA

<sup>2</sup>Department of Statistics, Stanford University, Stanford, CA 94305, USA

#### Chemical Analysis Sites:

Joshua N. Adkins,<sup>1</sup> Mary Anne Amper,<sup>2</sup> Julian Avila-Pacheco,<sup>3</sup> Brunilda Balliu,<sup>7</sup> Charles F. Burant,<sup>4</sup> Steve Carr,<sup>3</sup> Karl Clauser,<sup>3</sup> Clary B. Clish,<sup>3</sup> Surendra Dasari,<sup>5</sup> Courtney Dennis,<sup>3</sup> Charles R. Evans,<sup>4</sup> Facundo M. Fernández,<sup>6</sup> Laure Fresard,<sup>7</sup> David A. Gaul,<sup>6</sup> Nicole R. Gay,<sup>7</sup> Yongchao Ge,<sup>2</sup> Robert Gerszten,<sup>8</sup> Marina A. Gritsenko,<sup>1</sup> Joshua R. Hansen,<sup>1</sup> Chia Jiu Hung,<sup>7</sup> Chelsea Hutchison-Bunch,<sup>1</sup> Olga Ilkayeva,<sup>9</sup> Anna A. Ivanova,<sup>10</sup> Nimisha Jain,<sup>2</sup> Pierre M Jean-Beltran,<sup>3</sup> Maureen Kachman,<sup>4</sup> Manolis Kellis,<sup>3</sup> Hasmik Keshishian,<sup>3</sup> Katherine Klaus,<sup>5</sup> Karsten Krug,<sup>3</sup> Ian R. Lanza,<sup>5</sup> Tuuli Lappalainen,<sup>11</sup> Jun Z. Li,<sup>4</sup> SiDe Li,<sup>2</sup> Yafeng Li,<sup>6</sup> Kristal Maner-Smith,<sup>10</sup> D. R. Mani,<sup>3</sup> Jason E. McDermott,<sup>1</sup> Matthew E. Monroe,<sup>1</sup> Stephen B. Montgomery,<sup>7</sup> Samuel Moore,<sup>6</sup> Michael J. Muehlbauer,<sup>9</sup> Charlie Mundorff,<sup>3</sup> K Sreekumaran Nair,<sup>5</sup> Venugopalan Nair,<sup>2</sup> Christopher B. Newgard,<sup>9</sup> Christopher D. Nogiec,<sup>2</sup> German Nudelman,<sup>2</sup> Eric A. Ortlund,<sup>10</sup> Cadence Pearce,<sup>3</sup> Vladislav A. Petyuk,<sup>1</sup> Paul D. Piehowski,<sup>1</sup> Hanna Pincas,<sup>2</sup> Wei-Jun Qian,<sup>1</sup> Alexander B. Raskind,<sup>4</sup> Jeremy Robbins,<sup>8</sup> Aliza Rubenstein,<sup>2</sup> Frederique Ruf-Zamojski,<sup>2</sup> James A. Sanford,<sup>1</sup> Stuart C. Sealfon,<sup>2</sup> Nitish Seenarine,<sup>2</sup> Gregory Smith,<sup>2</sup> Kevin S. Smith,<sup>7</sup> Michael P. Snyder,<sup>7</sup> Tanu Soni,<sup>4</sup> Yifei Sun,<sup>2</sup> Karan Uppal,<sup>10</sup> Patrick Vanderboom,<sup>5</sup> Martin J. Walsh,<sup>2</sup> Elena Zavlasky,<sup>2</sup> Navid Zebajadi,<sup>7</sup> Tiantian Zhang,<sup>10</sup> Bingqing Zhao<sup>7</sup>

<sup>1</sup>Pacific Northwest National Laboratory, Richland, WA 99354, USA

<sup>2</sup>Icahn School of Medicine at Mount Sinai, New York, NY 10029, USA

<sup>3</sup>Broad Institute of MIT and Harvard, Cambridge, MA 02142, USA

<sup>4</sup>University of Michigan, Ann Arbor, MI 48103, USA

<sup>5</sup>Mayo Clinic, Rochester, MN 55901, USA

<sup>6</sup>Georgia Institute of Technology, Atlanta, GA 30322, USA

<sup>7</sup>Stanford University, Stanford, CA 94305, USA

<sup>8</sup>Beth Israel Deaconess Medical Center/ Harvard, Boston, MA 02215, USA

<sup>9</sup>Duke University, Durham, NC 27708, USA

<sup>10</sup>Emory University, Atlanta, GA 30322, USA

<sup>11</sup>New York Genome Center, Columbia University, New York, NY 10013, USA

#### Clinical Centers:

Marcas M. Bamman,<sup>1</sup> Susan L. Barr,<sup>2</sup> Bryan C Bergman,<sup>3</sup> Daniel H Bessesen,<sup>3</sup> Nick Broskey,<sup>4</sup> Thomas W. Buford,<sup>1</sup> Aisling Burns,<sup>5</sup> Toby Chambers<sup>6</sup>, Paul M. Coen,<sup>7</sup> Dan M Cooper,<sup>8</sup> Gary R. Cutter,<sup>1</sup> Gabriel Dubis,<sup>4</sup>

Sara Espinoza,<sup>5</sup> Daniel D. Forman,<sup>2</sup> Jonathan Gelfond,<sup>5</sup> Bret H. Goodpaster,<sup>7</sup> Fadia Haddad,<sup>8</sup> Melissa Harris,<sup>9</sup> Joseph A Houmard,<sup>4</sup> Kim M. Huffman,<sup>10</sup> John M. Jakicic,<sup>2</sup> Catherine M Jankowski,<sup>3</sup> Neil Johannsen,<sup>9</sup> Johanna L. Johnson,<sup>10</sup> Leslie Kelly,<sup>10</sup> Erin Kershaw,<sup>2</sup> Wendy M Kohrt,<sup>3</sup> William E. Kraus,<sup>10</sup> Bridget Lester,<sup>6</sup> Edward L Melanson,<sup>3</sup> Kerrie L Moreau,<sup>3</sup> Tatiana Moro,<sup>11</sup> Nicolas Musi,<sup>5</sup> Anne B. Newman,<sup>2</sup> Bradley C. Nindl,<sup>2</sup> Doug Paddon-Jones,<sup>11</sup> Lindsay C. Page,<sup>2</sup> Darpan Patel,<sup>5</sup> Shlomit Radom-Aizik,<sup>8</sup> Tuomo Rankinen,<sup>9</sup> Blake B. Rasmussen,<sup>11</sup> Ulrika Raue,<sup>6</sup> Eric Ravussin,<sup>9</sup> Renee J. Rogers,<sup>2</sup> Irene E Schauer,<sup>3</sup> Robert S Schwartz,<sup>3</sup> Monica Serra,<sup>5</sup> Cris A. Slentz,<sup>10</sup> Lauren M. Sparks,<sup>7</sup> Heidi Spratt,<sup>11</sup> Maja Stefanovic-Racic,<sup>2</sup> Scott Trappe,<sup>6</sup> Todd Trappe,<sup>6</sup> Elena Volpi,<sup>11</sup> Leslie H. Willis<sup>10</sup>

<sup>1</sup>University of Alabama at Birmingham, Birmingham, AL 362104, USA

<sup>2</sup>University of Pittsburgh, Pittsburgh, PA 16270, USA

<sup>3</sup>University of Colorado-Anschutz Medical Campus, Aurora, CO 90046, USA

<sup>4</sup>East Carolina University, Greenville, NC 28969, USA

<sup>5</sup>University of Texas Health Science Center at San Antonio, San Antonio, TX 892210, USA

<sup>6</sup>Ball State University, Muncie, IN 48307, USA

<sup>7</sup>Translational Research Institute, AdventHealth, Orlando, FL 32904, USA

<sup>8</sup>University of California-Irvine, Irvine, CA 102718, USA

<sup>9</sup>Pennington Biomedical Research Center, Baton Rouge, LA 80909, USA

<sup>10</sup>Duke University School of Medicine, Durham, NC 28811, USA

<sup>11</sup>University of Texas Medical Branch, Galveston, Galveston, TX 88666, USA

### **Consortium Coordinating Center:**

Walter T. Ambrosius,<sup>1</sup> Elaine Cornell,<sup>2</sup> Ching-ju Lu,<sup>3</sup> Michael E. Miller,<sup>4</sup> Barbara J. Nicklas,<sup>5</sup> Marco Pahor,<sup>3</sup> W. Jack Rejeski,<sup>4</sup> Jessica Rooney,<sup>2</sup> Scott Rushing,<sup>1</sup> Cynthia L. Stowe,<sup>1</sup> Russell P. Tracy<sup>2</sup>

<sup>1</sup>Department of Biostatistics and Data Science, Division of Public Health Sciences, Wake Forest School of Medicine, Medical Center Boulevard, Winston Salem NC 27157, USA

<sup>2</sup>Departments of Pathology & Laboratory Medicine and Biochemistry, Larner College of Medicine, University of Vermont, 360 South Park Drive, Colchester, VT 05446, USA

<sup>3</sup>Department of Aging and Geriatric Research, University of Florida, Gainesville, FL 32610, USA

<sup>4</sup>Department of Health and Exercise Science, Wake Forest University, Winston-Salem, NC 27109, USA

<sup>5</sup>Department of Internal Medicine, Section on Gerontology and Geriatric Medicine, Wake Forest School of Medicine, Medical Center Boulevard, Winston Salem NC 27157, USA

### **Preclinical Animal Study Sites:**

Brent G. Albertson,<sup>1</sup> Sue C. Bodine,<sup>2</sup> Karyn Esser,<sup>3</sup> Roger P. Farrar,<sup>4</sup> Laurie J. Goodyear,<sup>1</sup> Michael F. Hirshman,<sup>1</sup> Simon Schenk<sup>5</sup>

<sup>1</sup>Joslin Diabetes Center, Boston, MA 02215, USA

<sup>2</sup>Department of Internal Medicine, Endocrinology and Metabolism, University of Iowa Carver College of Medicine, Iowa City, IA 52242, USA

<sup>3</sup>Department of Physiology and Functional Genomics, University of Florida, Gainesville, FL 32611, USA

<sup>4</sup>Department of Kinesiology, The University of Texas at Austin, Austin, TX 78705, USA

<sup>5</sup>Department of Orthopedic Surgery, University of California San Diego, La Jolla CA 92093, USA

## **National Institutes of Health:**

**D. Lee Alekel,<sup>1,2</sup> Iddil Bekirov,<sup>3</sup> Amanda T. Boyce,<sup>1</sup> Josephine Boyington,<sup>4</sup> Jonelle K. Drugan,<sup>1</sup> Jerome L. Fleg,<sup>4</sup> Lyndon J. O. Joseph,<sup>5</sup> Maren R. Laughlin,<sup>3</sup> Padma Maruvada,<sup>3</sup> Stephanie A. Morris,<sup>2,6</sup> Joan A. McGowan,<sup>1</sup> Concepcion Nierras,<sup>2</sup> Vinay Pai,<sup>7,8</sup> Charlotte Peterson,<sup>1,9</sup> Ed Ramos,<sup>7,10</sup> Mary C. Roary,<sup>11,12</sup> John P. Williams,<sup>1</sup> Ashley Xia<sup>3</sup>**

<sup>1</sup>National Institute of Arthritis and Musculoskeletal and Skin Diseases, National Institutes of Health, Bethesda, MD 20892, USA.

<sup>2</sup>Division of Program Coordination, Planning, and Strategic Initiatives, National Institutes of Health, Bethesda, MD 20892, USA.

<sup>3</sup> National Institute of Diabetes and Digestive and Kidney Diseases, National Institutes of Health, Bethesda, MD 20892, USA.

<sup>4</sup>National Heart, Lung, and Blood Institute, National Institutes of Health, Bethesda, MD 20892, USA.

<sup>5</sup>National Institute on Aging, National Institutes of Health, Bethesda, MD 20892, USA.

<sup>6</sup>National Human Genome Research Institute, National Institutes of Health, Bethesda, MD 20892, USA.

<sup>7</sup> National Institute of Biomedical Imaging and Bioengineering, National Institutes of Health, Bethesda, MD 20892, USA.

<sup>8</sup>JanusView, Data Collaboratory, LLC, Olney, MD 20830, USA

<sup>9</sup>Center for Muscle Biology, University of Kentucky, Lexington, KY 40536, USA

<sup>10</sup>*All of Us* Research Program, National Institutes of Health, Bethesda, MD 20892, USA

<sup>11</sup>National Institute of Nursing Research, National Institutes of Health, Bethesda, MD 20892, USA

<sup>12</sup>Environmental Influences on Child Health Outcomes (ECHO) Program, National Institutes of Health, Bethesda, MD 20892, USA
